# Supplementary material for: Demonstration of the existence of intermolecular lone pair⋯π interaction between alcoholic oxygen and the C6F5 group in organic solvent
Source: Royal Society of Chemistry journal article supplement (doi:10.1039/b908752d), 2009-01-01
Supplement: b908752d.pdf [file b908752d.pdf]

## Supplementary information

### Demonstration of the existence of the intermolecular lone pair••• $\pi$ interaction between alcoholic oxygen and C<sub>6</sub>F<sub>5</sub> group in organic solvent

Toshinobu Korenaga,\* Taeko Shoji, Kazutaka Onoue and Takashi Sakai\*

*Division of Chemistry and Biochemistry, Graduate School of Natural Science and Technology, Okayama University, Okayama 700-8530, Japan.*

*Fax, Tel: +81-86-251-8092; E-mail: korenaga@cc.okayama-u.ac.jp*

### CONTENTS

|                                                                       |        |
|-----------------------------------------------------------------------|--------|
| General Experimental Methods.                                         | pp. 2  |
| Preparation of amines <b>1</b> .                                      | pp. 3  |
| Estimation of Association Constants by <sup>1</sup> H NMR Titrations. | pp. 5  |
| Computational studies of <b>1</b> and <b>2</b> .                      | pp. 12 |
| References for Supporting Information                                 | pp. 19 |

## General Experimental Methods.

All reactions were carried out under an argon atmosphere with dry solvents under anhydrous conditions, unless otherwise noted. Dehydrated tetrahydrofuran (THF), diethyl ether, and toluene were purchased from Kanto Chemical Co. and then were stored in Schlenk tubes under an argon atmosphere. Reagents were purchased at the highest commercial quality and used without further purification, unless otherwise stated.  $^1\text{H}$  NMR and  $^{13}\text{C}$  NMR spectra were measured at 200, 300 or 500 MHz (for  $^1\text{H}$  NMR) and 75 or 126 MHz (for  $^{13}\text{C}$  NMR), respectively, and chemical shifts are given relative to tetramethylsilane (TMS).  $^{19}\text{F}$  NMR spectra were measured at 282 MHz, and chemical shifts are given relative to  $\text{CCl}_3\text{F}$  using  $\text{C}_6\text{F}_6$  as secondary reference ( $-162.9$  ppm).  $^{31}\text{P}$  NMR spectra were measured at 121 MHz, and chemical shifts are given relative to 85%  $\text{H}_3\text{PO}_4$  externally.

## Preparation of amines 1.

### *N,N*-Dimethyl-2,3,4,5,6-pentafluorobenzeneethanamine (**1a**).

To a mixture of formic acid (0.63 mL, 16.6 mmol) and 2,3,4,5,6-pentafluorobenzeneethanamine<sup>1</sup> (0.70 g, 3.32 mmol) was added a 37% aqueous formaldehyde solution (0.69 mL, 6.64 mmol) at 0°C. After being stirred at 0°C for 5 h, the solution was heated at 100°C for 5 h. The reaction mixture was poured into 25% NaOH aqueous solution, and then was extracted with diethyl ether. The extract was dried over MgSO<sub>4</sub> and was concentrated under reduced pressure to give yellow oil, which was purified by distillation using Kugelrohr apparatus to give **1a** (0.25 g, 32%) as colorless oil.

<sup>1</sup>H NMR (200 MHz, CDCl<sub>3</sub>): δ 2.27 (s, 6H), 2.50 (t, *J* = 7.4 Hz, 2H), 2.86 (t, *J* = 7.4 Hz, 2H). <sup>13</sup>C NMR (126 MHz, CDCl<sub>3</sub>): 21.0, 45.3, 58.4, 113.6 (m), 137.6 (m), 139.8 (m), 145.4 (m). <sup>19</sup>F NMR (282 MHz, CDCl<sub>3</sub>): -164.1 (dt, *J* = 7.9, 21.4 Hz, 2F), -158.9 (t, *J* = 21.4 Hz, 1F), -145.0 (dd, *J* = 7.9, 21.4 Hz, 2F). IR (neat): 1123, 1151, 1265, 1377, 1502 and 2949 cm<sup>-1</sup>.

The elemental analysis of **1a** was performed after conversion of **1a** to its hydrochloride salt: Anal. calc. for C<sub>10</sub>H<sub>11</sub>NF<sub>5</sub>Cl : C 43.57, H 4.02, N 5.08%. Found: C 43.25, H 3.85, N, 4.95.

### *N,N*-Dimethyl-3,4,5-trifluorobenzeneethanamine (**1b**).

Compound **1b** (3.05 g, 63 %) was prepared from 3,4,5-trifluorobenzeneethanamine<sup>2</sup> by the procedure described for **1a**.

Colorless oil.

<sup>1</sup>H NMR (300 MHz, CDCl<sub>3</sub>): δ 2.26 (s, 6H), 2.49 (t, *J* = 7.8 Hz, 2H), 2.70 (t, *J* = 7.8 Hz, 2H), 6.81 (m, 2H). <sup>13</sup>C NMR (75.5 MHz, CDCl<sub>3</sub>): 33.8, 45.6, 60.8, 112.7 (m), 136.9 (m), 138.4 (dt, *J* = 15.1, 249 Hz), 151.3 (dm, *J* = 249 Hz). <sup>19</sup>F NMR (282 MHz, CDCl<sub>3</sub>): -165.6 (m, 1F), -136.4 (m, 2F). IR (neat): 1142, 1448, 1537, 1620, 2773 and 2945 cm<sup>-1</sup>.

The elemental analysis of **1b** was performed after conversion of **1b** to its hydrochloride salt: Anal. calc. for C<sub>10</sub>H<sub>13</sub>NF<sub>3</sub>Cl : C 50.11, H 5.47, N 5.84%. Found: C 50.35, H 5.31, N, 5.69.

### *N,N*-Dimethyl-4-trifluoromethyl-benzeneethanamine (**1c**).<sup>3</sup>

Compound **1c** (0.41 g, 36 %) was prepared from 4-trifluoromethyl-benzeneethanamine<sup>4</sup> by the procedure described for **1a**.

Colorless oil.

<sup>1</sup>H NMR (500 MHz, CDCl<sub>3</sub>): δ 2.32 (s, 6H), 2.57 (t, *J* = 8.0 Hz, 2H), 2.85 (t, *J* = 8.0 Hz, 2H), 7.32 (d, *J* = 8.0 Hz, 2H), 7.52 (d, *J* = 8.0 Hz, 2H). <sup>13</sup>C NMR (75.5 MHz, CDCl<sub>3</sub>): 33.8, 44.9, 60.6, 124.1 (q, *J* = 272 Hz), 124.9, 128.0 (q, *J* = 32.5 Hz), 128.6, 144.4. <sup>19</sup>F NMR (282 MHz, CDCl<sub>3</sub>): -64.3 (s). IR (neat): 829, 1020, 1167, 1325, 1375, 1618, 2860 and 2947 cm<sup>-1</sup>.

***N,N*-Dimethyl-4-fluorobenzeneethanamine (1d).**<sup>5</sup>

Compound **1d** (1.13 g, 89 %) was prepared from commercially available 4-fluorobenzeneethanamine by the procedure described for **1a**.

Colorless oil.

<sup>1</sup>H NMR (300 MHz, CDCl<sub>3</sub>): δ 2.30 (s, 6H), 2.50 (t, *J* = 8.0 Hz, 2H), 2.75 (t, *J* = 8.0 Hz, 2H), 6.96 (m, 2H), 7.15 (m, 2H). <sup>13</sup>C NMR (75.5 MHz, CDCl<sub>3</sub>): 33.2, 45.0, 61.2, 114.7 (d, *J* = 20.9 Hz), 129.6 (d, *J* = 7.7 Hz), 135.7 (d, *J* = 3.2 Hz), 161.0 (d, *J* = 243 Hz). <sup>19</sup>F NMR (282 MHz, CDCl<sub>3</sub>): -119.1 (m). IR (neat): 1016, 1221, 1265, 1445, 1510, 1601 and 2725 cm<sup>-1</sup>.

***N,N*-Dimethylphenethylamine (1e).**<sup>6</sup>

Compound **1e** (4.96 g, 42 %) was prepared from commercially available phenethylamine by the procedure described for **1a**.

Colorless oil.

<sup>1</sup>H NMR (500 MHz, CDCl<sub>3</sub>): δ 2.30 (s, 6H), 2.53 (t, *J* = 8.0 Hz, 2H), 2.78 (t, *J* = 8.0 Hz, 2H), 7.18-7.21 (m, 3H), 7.27-7.30 (m, 2H). <sup>13</sup>C NMR (75.5 MHz, CDCl<sub>3</sub>): 34.2, 45.2, 61.4, 125.7, 128.1, 128.4, 140.1. IR (neat): 864, 1263, 1373, 1454, 1605, 2856 and 2943 cm<sup>-1</sup>.

***N,N*-Dimethyl-4-methoxy-benzeneethanamine (1f).**<sup>7</sup>

Compound **1f** (0.78 g, 64 %) was prepared from commercially available 4-methoxy-benzeneethanamine by the procedure described for **1a**.

Colorless oil.

<sup>1</sup>H NMR (500 MHz, CDCl<sub>3</sub>): δ 2.29 (s, 6H), 2.49 (t, *J* = 8.0 Hz, 2H), 2.72 (t, *J* = 8.0 Hz, 2H), 3.78 (s, 3H), 6.83 (d, *J* = 9.0 Hz, 2H), 7.12 (d, *J* = 9.0 Hz, 2H). <sup>13</sup>C NMR (75.5 MHz, CDCl<sub>3</sub>): 33.0, 44.9, 54.3, 61.3, 113.2, 129.0, 131.8, 157.4. IR (neat): 870, 1248, 1371, 1464, 1614, 2856 and 3030 cm<sup>-1</sup>.

## Estimation of Association Constants by $^1\text{H}$ NMR Titrations.

All amines **1** and  $\text{CDCl}_3$  were stored with activated MS-3A under argon atmosphere after being filtered through basic alumina column, respectively. All amines **1** were distilled by Kugelrohr apparatus before NMR titration.

As a typical example, the titration between **1a** and MeOH is described here. Six portion of 0.25 mL of 0.966M MeOH solutions in  $\text{CDCl}_3$  were added to 0.000, 50.88, 96.78, 143.39, 191.73, or 239.45 mg of **1a**, respectively. All solutions were diluted with  $\text{CDCl}_3$  until 1.00 mL accurately. Each of the resulting solutions was placed in six NMR tubes, and then the NMR tubes were sealed.  $^1\text{H}$  NMR spectra were taken for each tube at 27, 37, and 47 °C. Association constants ( $K_a$ ) were calculated by nonlinear curve-fitting method.

## NMR titration between 1a and MeOH.

Concentration of MeOH is 0.2415 M.

$\delta_{\text{obs}}$  is the chemical shifts at the H atom of MeOH's hydroxy proton.

$$\Delta\delta = \delta_{\text{obs}} - \delta_{\text{obs}}^{\text{amine/MeOH}=0}$$

$\delta_c$  is the predicted chemical shift of the complex 2a.

Results of NMR titration.

| Ratio of 1a<br>per MeOH | 27/°C                            |                           | 37/°C                            |                           | 47/°C                            |                           |
|-------------------------|----------------------------------|---------------------------|----------------------------------|---------------------------|----------------------------------|---------------------------|
|                         | $\delta_{\text{obs}}/\text{ppm}$ | $\Delta\delta/\text{ppm}$ | $\delta_{\text{obs}}/\text{ppm}$ | $\Delta\delta/\text{ppm}$ | $\delta_{\text{obs}}/\text{ppm}$ | $\Delta\delta/\text{ppm}$ |
| 0.000                   | 1.188                            | 0.000                     | 1.100                            | 0.000                     | 1.028                            | 0.000                     |
| 0.919                   | 1.859                            | 0.671                     | 1.632                            | 0.532                     | 1.449                            | 0.421                     |
| 1.748                   | 2.308                            | 1.120                     | 2.019                            | 0.919                     | 1.778                            | 0.750                     |
| 2.590                   | 2.656                            | 1.468                     | 2.326                            | 1.226                     | 2.050                            | 1.022                     |
| 3.463                   | 2.940                            | 1.752                     | 2.582                            | 1.482                     | 2.285                            | 1.257                     |
| 4.325                   | 3.151                            | 1.963                     | 2.801                            | 1.701                     | 2.477                            | 1.449                     |
| $K_a/M^{-1}$            | <b>1.343±0.011</b>               |                           | <b>0.9477±0.022</b>              |                           | <b>0.7060±0.041</b>              |                           |
| $\delta_c/\text{ppm}$   | <b>4.38</b>                      |                           | <b>4.81</b>                      |                           | <b>4.75</b>                      |                           |

Graph of NMR titration.

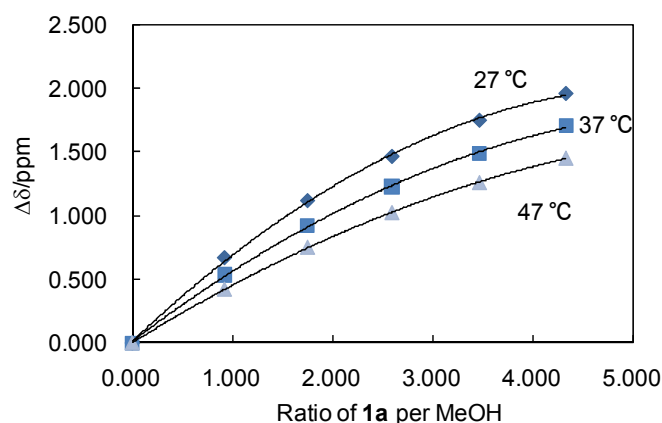

$\Delta H_{\text{obs}}$  and  $\Delta S_{\text{obs}}$  were determined from van't Hoff plot and eq. 2.

$$\ln K_a = -(\Delta H / R) \cdot (1 / T) + \Delta S / R \quad (2)$$

$$\Delta H_{\text{obs}} = -6.15 \text{ kcal mol}^{-1}$$

$$\Delta S_{\text{obs}} = -19.9 \text{ cal mol}^{-1} \text{ K}^{-1}$$

van't Hoff plot

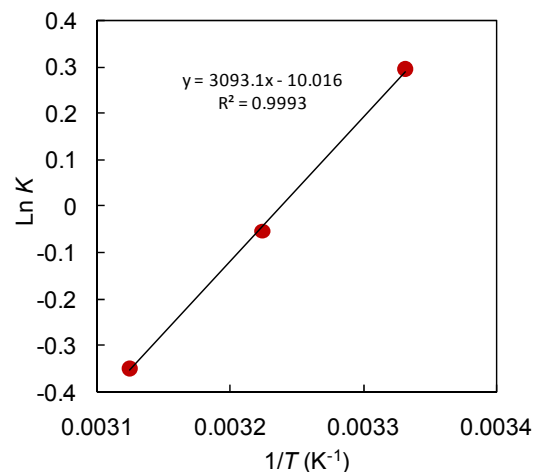

## NMR titration between **1b** and MeOH.

Concentration of MeOH is 0.1957 M.

$\delta_{\text{obs}}$  is the chemical shifts at the H atom of MeOH's hydroxy proton.

$$\Delta\delta = \delta_{\text{obs}} - \delta_{\text{obs}}^{\text{amine/MeOH}=0}$$

$\delta_c$  is the predicted chemical shift of the complex **2b**.

Results of NMR titration.

| Ratio of <b>1b</b><br>per MeOH | 27/°C                            |                           | 37/°C                            |                           | 47/°C                            |                           |
|--------------------------------|----------------------------------|---------------------------|----------------------------------|---------------------------|----------------------------------|---------------------------|
|                                | $\delta_{\text{obs}}/\text{ppm}$ | $\Delta\delta/\text{ppm}$ | $\delta_{\text{obs}}/\text{ppm}$ | $\Delta\delta/\text{ppm}$ | $\delta_{\text{obs}}/\text{ppm}$ | $\Delta\delta/\text{ppm}$ |
| 0.000                          | 1.147                            | 0.000                     | 1.068                            | 0.000                     | 1.001                            | 0.000                     |
| 0.914                          | 1.878                            | 0.731                     | 1.646                            | 0.578                     | 1.456                            | 0.455                     |
| 1.979                          | 2.432                            | 1.285                     | 2.121                            | 1.053                     | 1.854                            | 0.853                     |
| 3.208                          | 2.998                            | 1.851                     | 2.619                            | 1.551                     | 2.284                            | 1.283                     |
| 4.188                          | 3.335                            | 2.188                     | 2.930                            | 1.862                     | 2.564                            | 1.563                     |
| 4.959                          | 3.527                            | 2.380                     | 3.121                            | 2.053                     | 2.732                            | 1.731                     |
| $K_a/M^{-1}$                   | <b>1.138±0.104</b>               |                           | <b>0.8227±0.068</b>              |                           | <b>0.6253±0.057</b>              |                           |
| $\delta_c/\text{ppm}$          | <b>5.94</b>                      |                           | <b>5.94</b>                      |                           | <b>6.08</b>                      |                           |

Graph of NMR titration.

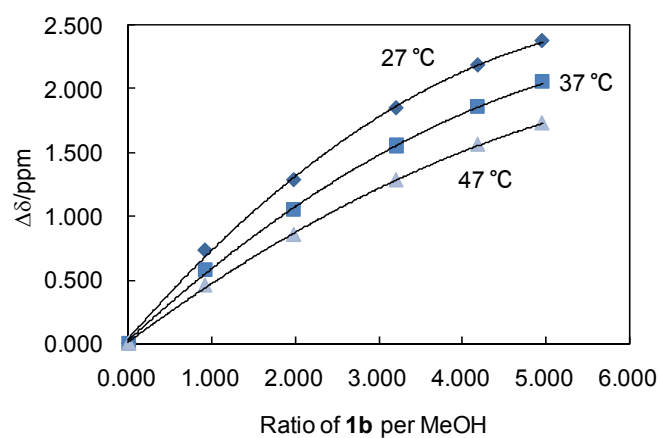

$\Delta H_{\text{obs}}$  and  $\Delta S_{\text{obs}}$  were determined from van't Hoff plot and eq. 1.

$$\ln K_a = -(\Delta H / R) \cdot (1 / T) + \Delta S / R \quad (2)$$

$$\Delta H_{\text{obs}} = -5.72 \text{ kcal mol}^{-1}$$

$$\Delta S_{\text{obs}} = -18.8 \text{ cal mol}^{-1} \text{ K}^{-1}$$

van't Hoff plot

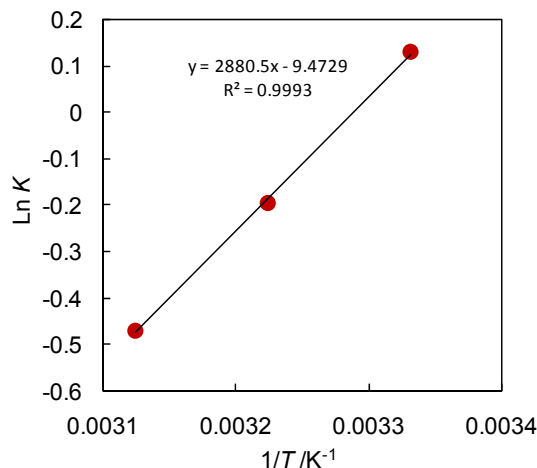

## NMR titration between 1c and MeOH.

Concentration of MeOH is 0.2255 M.

$\delta_{\text{obs}}$  is the chemical shifts at the H atom of MeOH's hydroxy proton.

$$\Delta\delta = \delta_{\text{obs}} - \delta_{\text{obs}}^{\text{amine/MeOH}=0}$$

$\delta_c$  is the predicted chemical shift of the complex 2c.

Results of NMR titration.

| Ratio of 1c<br>per MeOH | 27/°C                            |                           | 37/°C                            |                           | 47/°C                            |                           |
|-------------------------|----------------------------------|---------------------------|----------------------------------|---------------------------|----------------------------------|---------------------------|
|                         | $\delta_{\text{obs}}/\text{ppm}$ | $\Delta\delta/\text{ppm}$ | $\delta_{\text{obs}}/\text{ppm}$ | $\Delta\delta/\text{ppm}$ | $\delta_{\text{obs}}/\text{ppm}$ | $\Delta\delta/\text{ppm}$ |
| 0.000                   | 1.155                            | 0.000                     | 1.076                            | 0.000                     | 1.007                            | 0.000                     |
| 0.839                   | 2.053                            | 0.898                     | 1.793                            | 0.717                     | 1.579                            | 0.572                     |
| 2.145                   | 2.911                            | 1.756                     | 2.550                            | 1.474                     | 2.238                            | 1.231                     |
| 3.105                   | 3.353                            | 2.198                     | 2.950                            | 1.874                     | 2.595                            | 1.588                     |
| 4.499                   | 3.791                            | 2.636                     | 3.390                            | 2.314                     | 3.011                            | 2.004                     |
| 5.312                   | 3.984                            | 2.829                     | 3.577                            | 2.501                     | 3.199                            | 2.192                     |
| $K_a/M^{-1}$            | <b>1.138±0.104</b>               |                           | <b>0.8227±0.068</b>              |                           | <b>0.6253±0.057</b>              |                           |
| $\delta_c/\text{ppm}$   | <b>5.52</b>                      |                           | <b>5.43</b>                      |                           | <b>5.40</b>                      |                           |

Graph of NMR titration.

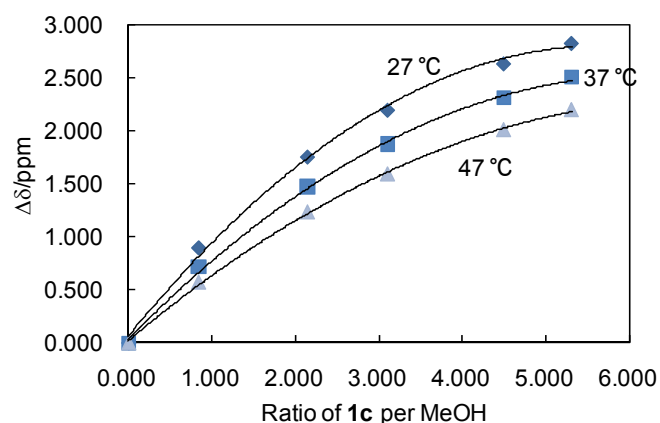

$\Delta H_{\text{obs}}$  and  $\Delta S_{\text{obs}}$  were determined from van't Hoff plot and eq. 1.

$$\ln K_a = -(\Delta H / R) \cdot (1 / T) + \Delta S / R \quad (2)$$

$$\Delta H_{\text{obs}} = -5.85 \text{ kcal mol}^{-1}$$

$$\Delta S_{\text{obs}} = -18.4 \text{ cal mol}^{-1} \text{ K}^{-1}$$

van't Hoff plot

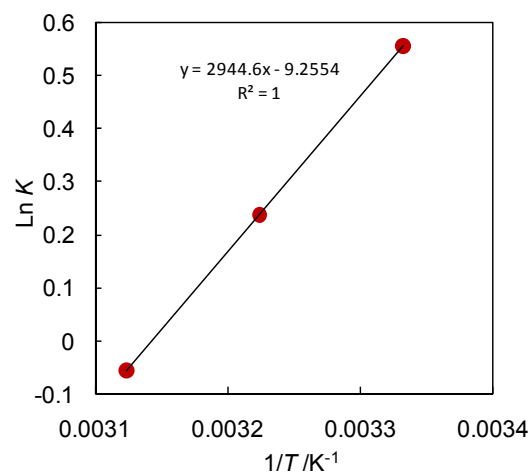



## NMR titration between **1d** and MeOH.

Concentration of MeOH is 0.2395 M.

$\delta_{\text{obs}}$  is the chemical shifts at the H atom of MeOH's hydroxy proton.

$$\Delta\delta = \delta_{\text{obs}} - \delta_{\text{obs}}^{\text{amine/MeOH}=0}$$

$\delta_c$  is the predicted chemical shift of the complex **2d**.

Results of NMR titration.

| Ratio of <b>1d</b><br>per MeOH | 27/°C                            |                           | 37/°C                            |                           | 47/°C                            |                           |
|--------------------------------|----------------------------------|---------------------------|----------------------------------|---------------------------|----------------------------------|---------------------------|
|                                | $\delta_{\text{obs}}/\text{ppm}$ | $\Delta\delta/\text{ppm}$ | $\delta_{\text{obs}}/\text{ppm}$ | $\Delta\delta/\text{ppm}$ | $\delta_{\text{obs}}/\text{ppm}$ | $\Delta\delta/\text{ppm}$ |
| 0.000                          | 1.228                            | 0.000                     | 1.133                            | 0.000                     | 1.054                            | 0.000                     |
| 0.814                          | 2.153                            | 0.925                     | 1.888                            | 0.755                     | 1.668                            | 0.614                     |
| 1.878                          | 2.915                            | 1.687                     | 2.563                            | 1.430                     | 2.259                            | 1.205                     |
| 2.624                          | 3.311                            | 2.083                     | 2.922                            | 1.789                     | 2.578                            | 1.524                     |
| 3.980                          | 3.796                            | 2.568                     | 3.410                            | 2.277                     | 3.034                            | 1.980                     |
| 5.301                          | 4.095                            | 2.867                     | 3.711                            | 2.578                     | 3.357                            | 2.303                     |
| $K_a/M^{-1}$                   | <b>2.092±0.064</b>               |                           | <b>1.531±0.044</b>               |                           | <b>1.126±0.019</b>               |                           |
| $\delta_c/\text{ppm}$          | <b>5.42</b>                      |                           | <b>5.33</b>                      |                           | <b>5.27</b>                      |                           |

Graph of NMR titration.

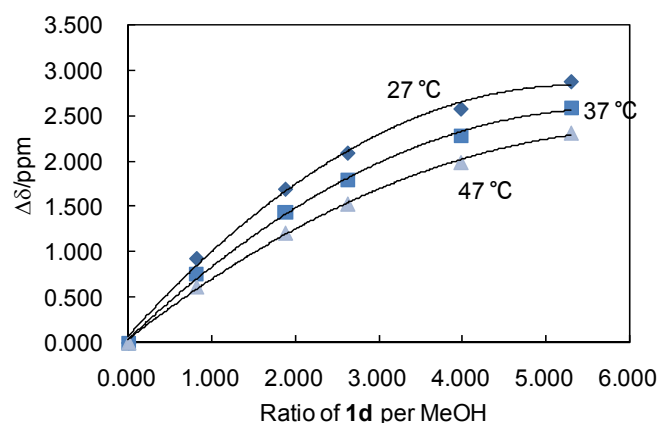

$\Delta H_{\text{obs}}$  and  $\Delta S_{\text{obs}}$  were determined from van't Hoff plot and eq. 1.

$$\ln K_a = -(\Delta H / R) \cdot (1 / T) + \Delta S / R \quad (2)$$

$$\Delta H_{\text{obs}} = -5.92 \text{ kcal mol}^{-1}$$

$$\Delta S_{\text{obs}} = -18.6 \text{ cal mol}^{-1} \text{ K}^{-1}$$

van't Hoff plot

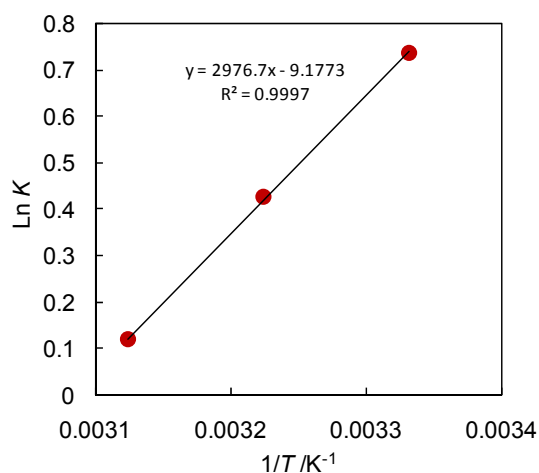

## NMR titration between **1e** and MeOH.

Concentration of MeOH is 0.2243 M.

$\delta_{\text{obs}}$  is the chemical shifts at the H atom of MeOH's hydroxy proton.

$$\Delta\delta = \delta_{\text{obs}} - \delta_{\text{obs}}^{\text{amine/MeOH}=0}$$

$\delta_c$  is the predicted chemical shift of the complex **2e**.

Results of NMR titration.

| Ratio of <b>1e</b><br>per MeOH | 27/°C                            |                           | 37/°C                            |                           | 47/°C                            |                           |
|--------------------------------|----------------------------------|---------------------------|----------------------------------|---------------------------|----------------------------------|---------------------------|
|                                | $\delta_{\text{obs}}/\text{ppm}$ | $\Delta\delta/\text{ppm}$ | $\delta_{\text{obs}}/\text{ppm}$ | $\Delta\delta/\text{ppm}$ | $\delta_{\text{obs}}/\text{ppm}$ | $\Delta\delta/\text{ppm}$ |
| 0.000                          | 1.182                            | 0.000                     | 1.096                            | 0.000                     | 1.024                            | 0.000                     |
| 1.078                          | 2.441                            | 1.259                     | 2.133                            | 1.037                     | 1.867                            | 0.843                     |
| 2.048                          | 3.145                            | 1.963                     | 2.753                            | 1.657                     | 2.414                            | 1.390                     |
| 3.429                          | 3.762                            | 2.580                     | 3.343                            | 2.247                     | 2.964                            | 1.940                     |
| 4.617                          | 4.132                            | 2.950                     | 3.716                            | 2.620                     | 3.324                            | 2.300                     |
| 5.658                          | 4.336                            | 3.154                     | 3.947                            | 2.851                     | 3.566                            | 2.542                     |
| $K_a/M^{-1}$                   | <b>2.169±0.047</b>               |                           | <b>1.568±0.038</b>               |                           | <b>1.154±0.022</b>               |                           |
| $\delta_c/\text{ppm}$          | <b>5.64</b>                      |                           | <b>5.55</b>                      |                           | <b>5.48</b>                      |                           |

Graph of NMR titration.

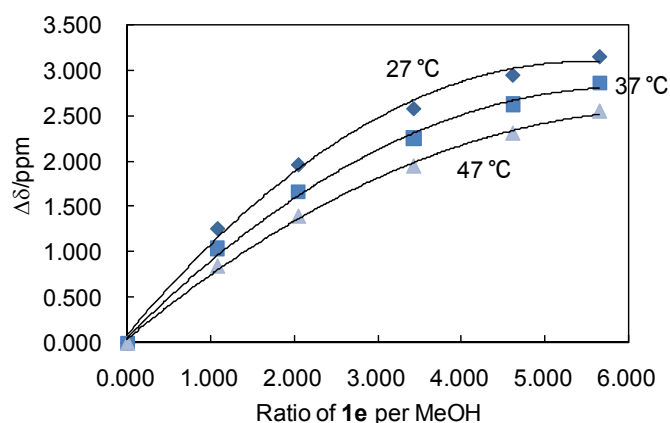

$\Delta H_{\text{obs}}$  and  $\Delta S_{\text{obs}}$  were determined from van't Hoff plot and eq. 1.

$$\ln K_a = -(\Delta H / R) \cdot (1 / T) + \Delta S / R \quad (2)$$

$$\Delta H_{\text{obs}} = -6.03 \text{ kcal mol}^{-1}$$

$$\Delta S_{\text{obs}} = -18.5 \text{ cal mol}^{-1} \text{ K}^{-1}$$

van't Hoff plot

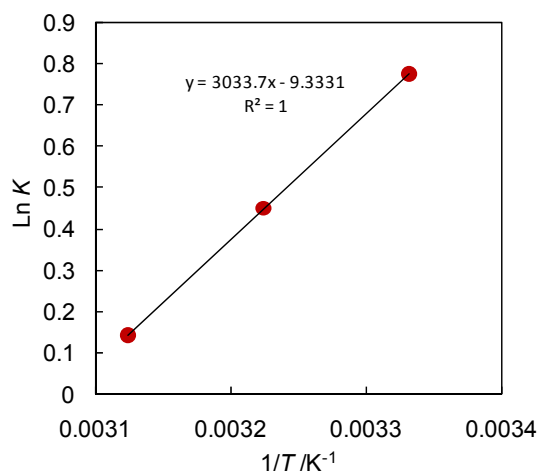

## NMR titration between **1f** and MeOH.

Concentration of MeOH is 0.2217 M.

$\delta_{\text{obs}}$  is the chemical shifts at the H atom of MeOH's hydroxy proton.

$$\Delta\delta = \delta_{\text{obs}} - \delta_{\text{obs}}^{\text{amine/MeOH}=0}$$

$\delta_c$  is the predicted chemical shift of the complex **2f**.

Results of NMR titration.

| Ratio of <b>1f</b><br>per MeOH | 27/°C                            |                           | 37/°C                            |                           | 47/°C                            |                           |
|--------------------------------|----------------------------------|---------------------------|----------------------------------|---------------------------|----------------------------------|---------------------------|
|                                | $\delta_{\text{obs}}/\text{ppm}$ | $\Delta\delta/\text{ppm}$ | $\delta_{\text{obs}}/\text{ppm}$ | $\Delta\delta/\text{ppm}$ | $\delta_{\text{obs}}/\text{ppm}$ | $\Delta\delta/\text{ppm}$ |
| 0.000                          | 1.174                            | 0.000                     | 1.091                            | 0.000                     | 1.021                            | 0.000                     |
| 1.052                          | 2.275                            | 1.101                     | 1.995                            | 0.904                     | 1.762                            | 0.741                     |
| 2.252                          | 3.044                            | 1.870                     | 2.688                            | 1.597                     | 2.376                            | 1.355                     |
| 3.266                          | 3.470                            | 2.296                     | 3.084                            | 1.993                     | 2.750                            | 1.729                     |
| 4.431                          | 3.852                            | 2.678                     | 3.452                            | 2.361                     | 3.106                            | 2.085                     |
| 5.659                          | 4.059                            | 2.885                     | 3.726                            | 2.635                     | 3.376                            | 2.355                     |
| $K_a/M^{-1}$                   | <b>2.006±0.090</b>               |                           | <b>1.411±0.034</b>               |                           | <b>1.060±0.020</b>               |                           |
| $\delta_c/\text{ppm}$          | <b>5.39</b>                      |                           | <b>5.39</b>                      |                           | <b>5.34</b>                      |                           |

Graph of NMR titration.

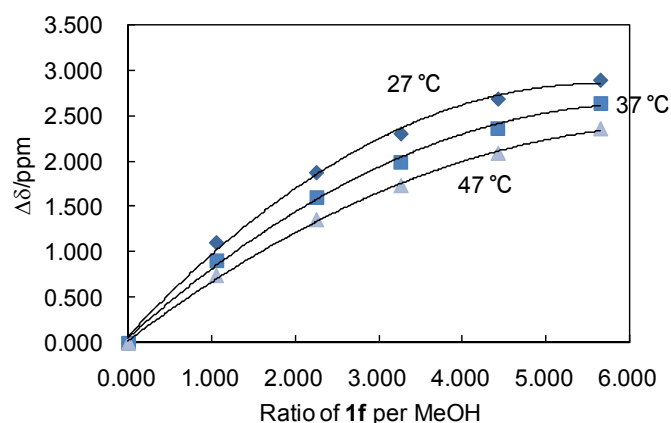

$\Delta H_{\text{obs}}$  and  $\Delta S_{\text{obs}}$  were determined from van't Hoff plot and eq. 1.

$$\ln K_a = -(\Delta H / R) \cdot (1 / T) + \Delta S / R \quad (2)$$

$$\Delta H_{\text{obs}} = -6.09 \text{ kcal mol}^{-1}$$

$$\Delta S_{\text{obs}} = -18.9 \text{ cal mol}^{-1} \text{ K}^{-1}$$

van't Hoff plot

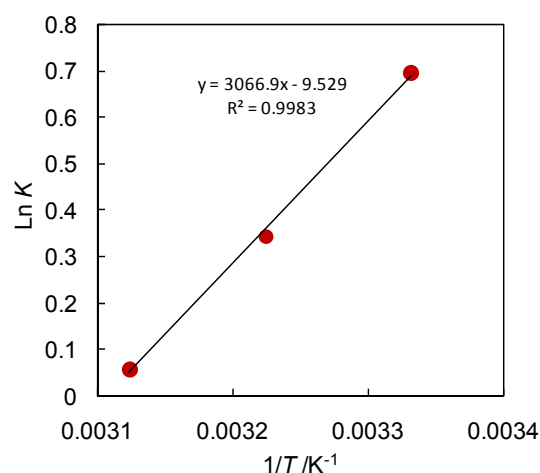

## Computational studies of **1a** and **2a**.

Geometry optimizations and energy calculations of **1a** for each conformations were performed at the MP2(full)/6-31G(d,p). Geometry optimizations and energy calculations of **2a** for each conformations were performed at the CP-MP2(full)/6-31G(d,p).

Summary of energies.

| Conformation | <b>1a</b><br>(Hartree) | <b>2a</b><br>(Hartree) |
|--------------|------------------------|------------------------|
| A            | <b>-938.51027</b>      | <b>-1053.91142</b>     |
| B            | -938.50606             | -1053.90608            |
| C            | -938.50560             | -1053.90649            |
| D            | -938.50680             | -1053.90739            |
| E            | -938.50616             | -1053.90591            |

### Results of **1a**.

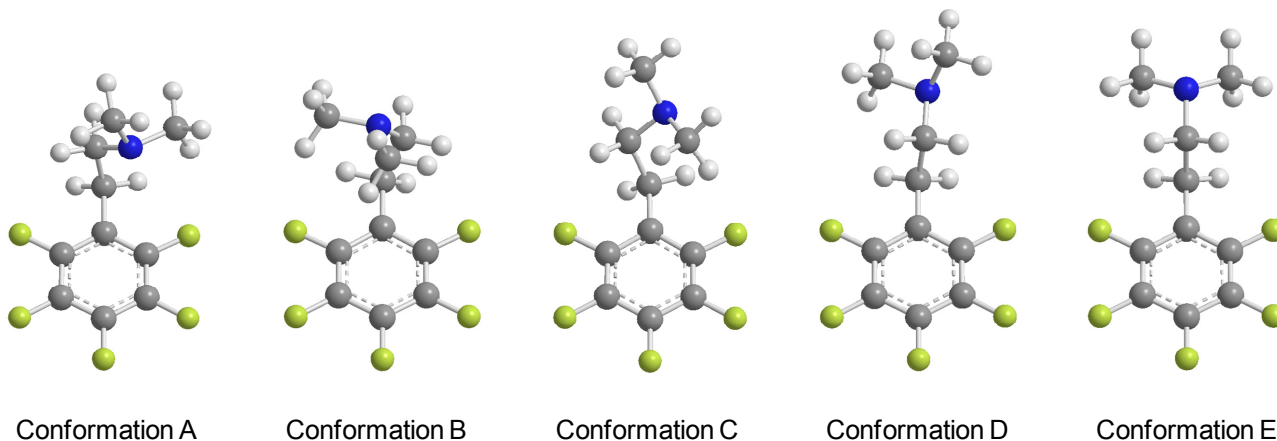

### Results of **2a**.

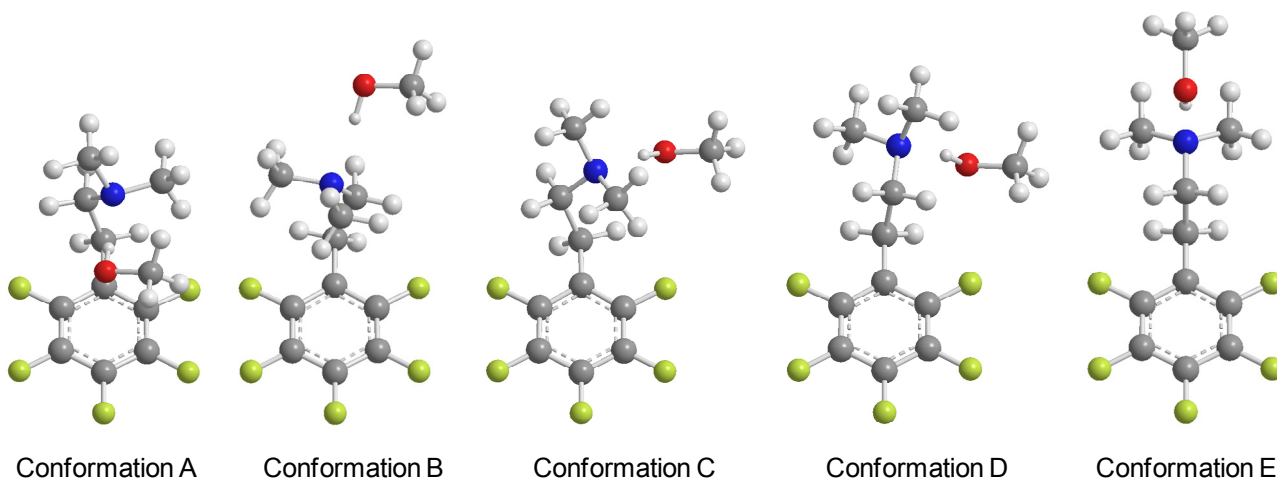

## Computational studies of **1b** and **2b**.

Geometry optimizations and energy calculations of **1b** for each conformations were performed at the MP2(full)/6-31G(d,p). Geometry optimizations and energy calculations of **2b** for each conformations were performed at the CP-MP2(full)/6-31G(d,p).

Summary of energies.

| Conformation | <b>1b</b><br>(Hartree) | <b>2b</b><br>(Hartree) |
|--------------|------------------------|------------------------|
| A            | <b>-740.49910</b>      | -855.89892             |
| B            | -740.49554             | -855.89573             |
| C            | -740.49724             | -855.89948             |
| D            | -740.49778             | <b>-855.89954</b>      |
| E            | -740.49678             | -855.89657             |

Results of **1b**.

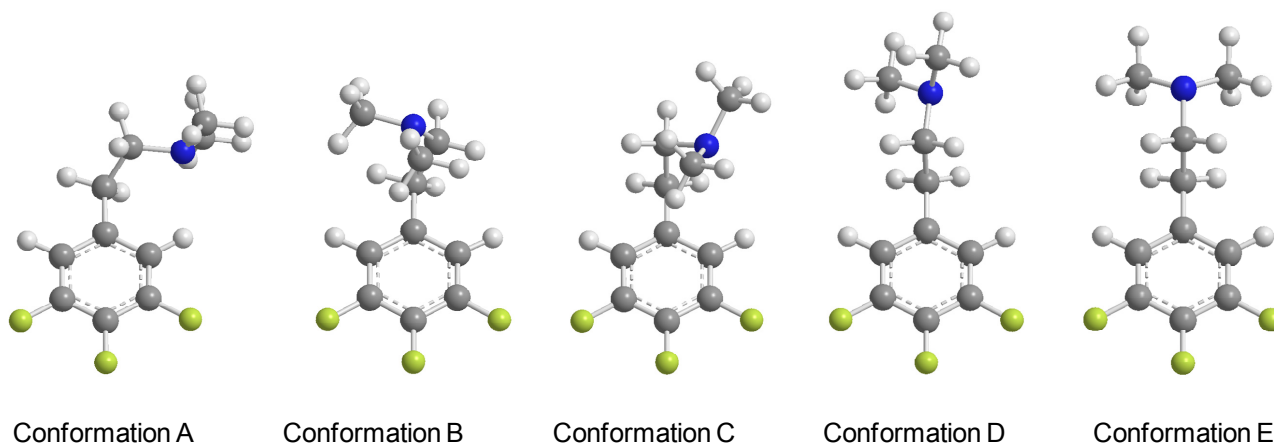

Results of **2b**.

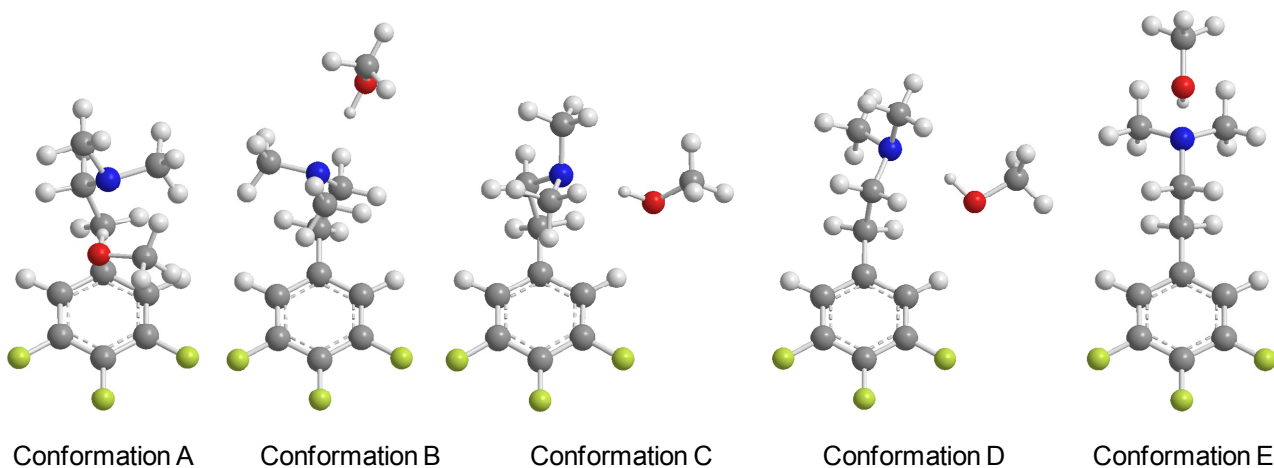

## Computational studies of **1c** and **2c**.

Geometry optimizations and energy calculations of **1c** for each conformations were performed at the MP2(full)/6-31G(d,p). Geometry optimizations and energy calculations of **2c** for each conformations were performed at the CP-MP2(full)/6-31G(d,p).

Summary of energies.

| Conformation | <b>1c</b><br>(Hartree) | <b>2c</b><br>(Hartree) |
|--------------|------------------------|------------------------|
| A            | <b>-779.73629</b>      | -895.13626             |
| B            | -779.73316             | -895.13355             |
| C            | -779.73482             | -895.13685             |
| D            | -779.73542             | <b>-895.13698</b>      |
| E            | -779.73445             | -895.13439             |

### Results of **1c**.

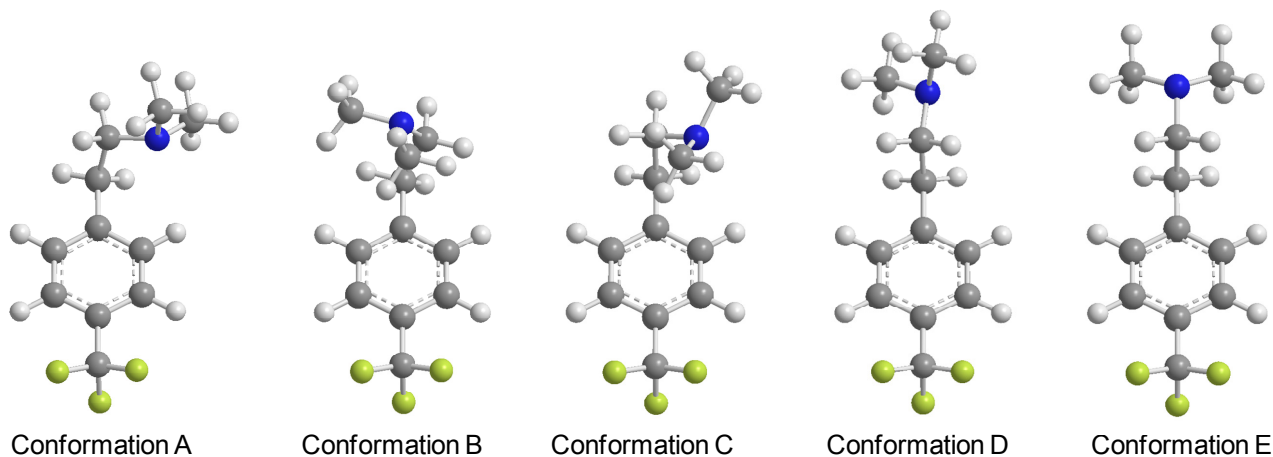

### Results of **2c**.

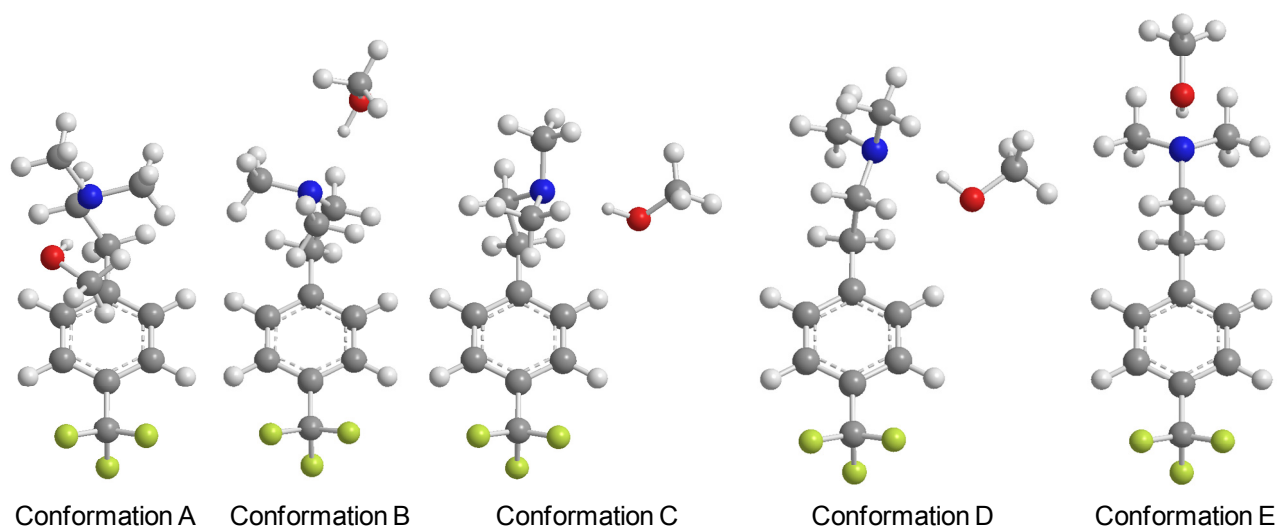

## Computational studies of **1d** and **2d**.

Geometry optimizations and energy calculations of **1d** for each conformations were performed at the MP2(full)/6-31G(d,p). Geometry optimizations and energy calculations of **2d** for each conformations were performed at the CP-MP2(full)/6-31G(d,p).

Summary of energies.

| Conformation | <b>1d</b><br>(Hartree) | <b>2d</b><br>(Hartree) |
|--------------|------------------------|------------------------|
| A            | <b>-542.48683</b>      | -657.88709             |
| B            | -542.48401             | -657.88465             |
| C            | -542.48547             | -657.88761             |
| D            | -542.48631             | <b>-657.88775</b>      |
| E            | -542.48525             | -657.88543             |

### Results of **1d**.

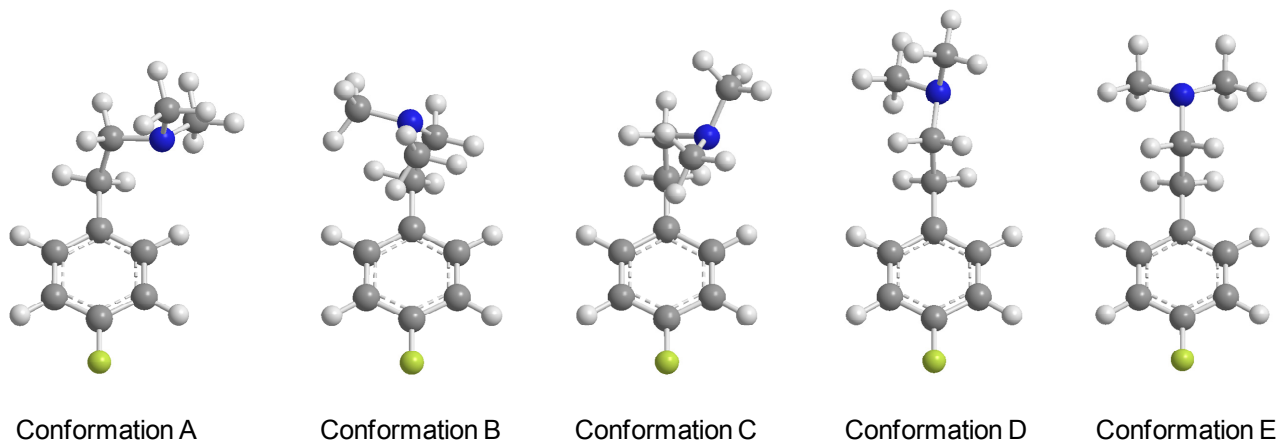

### Results of **2d**.

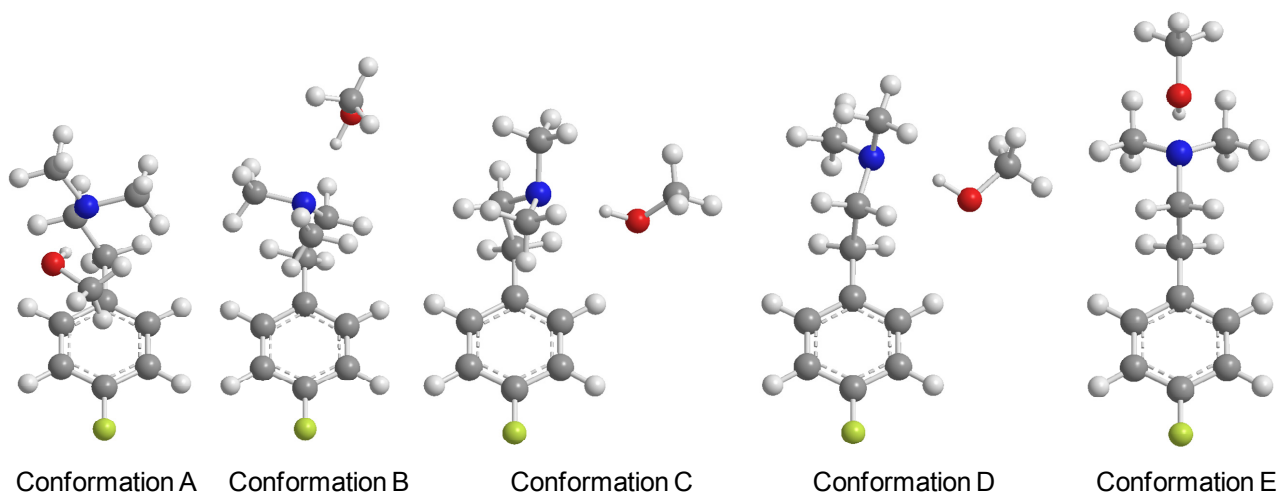

## Computational studies of **1e** and **2e**.

Geometry optimizations and energy calculations of **1e** for each conformations were performed at the MP2(full)/6-31G(d,p). Geometry optimizations and energy calculations of **2e** for each conformations were performed at the CP-MP2(full)/6-31G(d,p).

Summary of energies.

| Conformation | <b>1e</b><br>(Hartree) | <b>2e</b><br>(Hartree) |
|--------------|------------------------|------------------------|
| A            | <b>-443.47335</b>      | -558.87415             |
| B            | -443.47102             | -558.87193             |
| C            | -443.47225             | -558.87434             |
| D            | -443.47323             | <b>-558.87454</b>      |
| E            | -443.47224             | -558.87257             |

Results of **1e**.

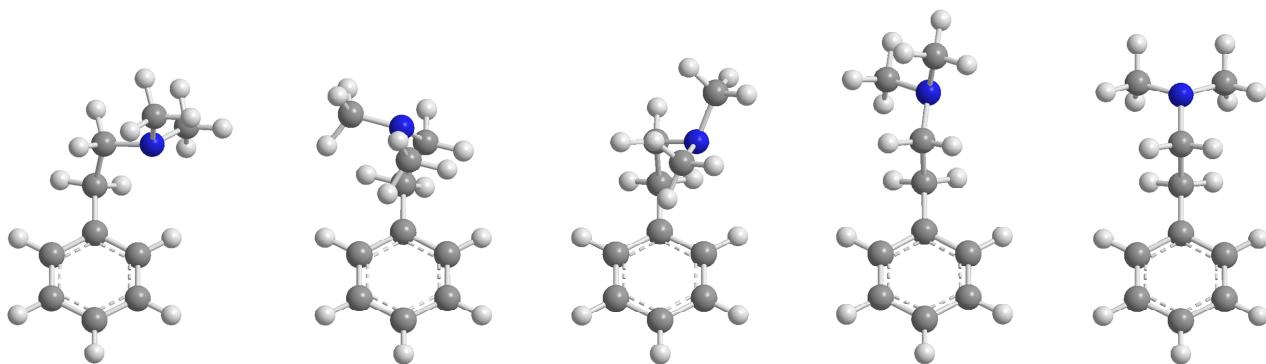

Conformation A

Conformation B

Conformation C

Conformation D

Conformation E

Results of **2e**.

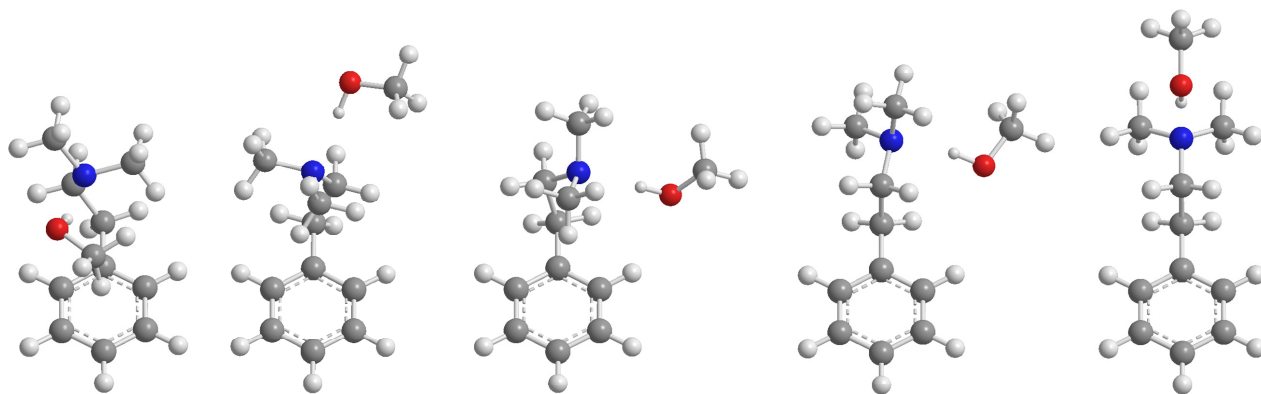

Conformation A

Conformation B

Conformation C

Conformation D

Conformation E



## Computational studies of **1f** and **2f**.

Geometry optimizations and energy calculations of **1f** for each conformations were performed at the MP2(full)/6-31G(d,p). Geometry optimizations and energy calculations of **2f** for each conformations were performed at the CP-MP2(full)/6-31G(d,p).

Summary of energies.

| Conformation | <b>1f</b><br>(Hartree) | <b>2f</b><br>(Hartree) |
|--------------|------------------------|------------------------|
| A            | <b>-557.68567</b>      | -673.08692             |
| B            | -557.68351             | -673.08436             |
| C            | -557.68455             | -673.08661             |
| D            | -557.68554             | <b>-673.08695</b>      |
| E            | -557.68450             | -673.08524             |

### Results of **1f**.

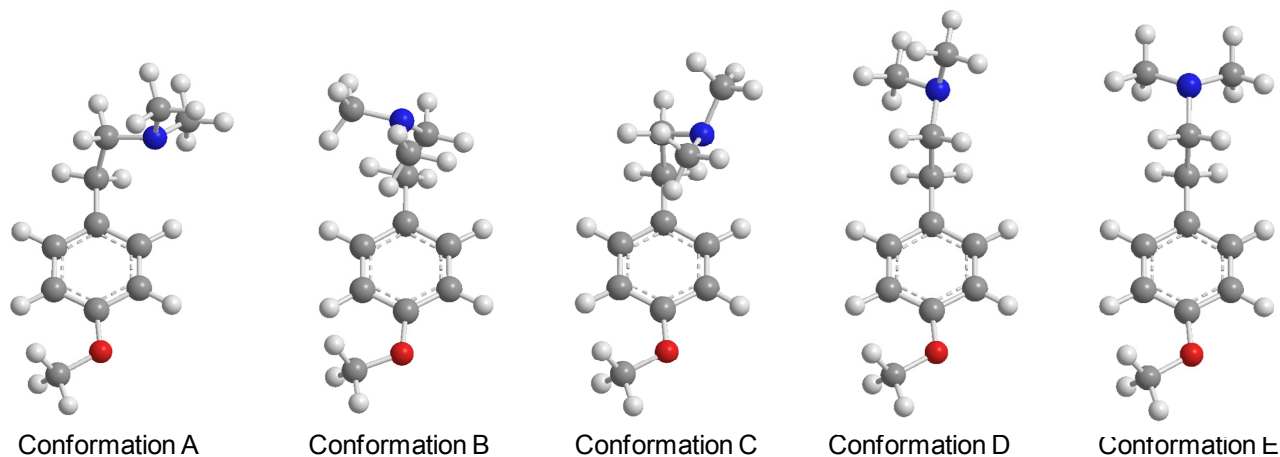

### Results of **2f**.

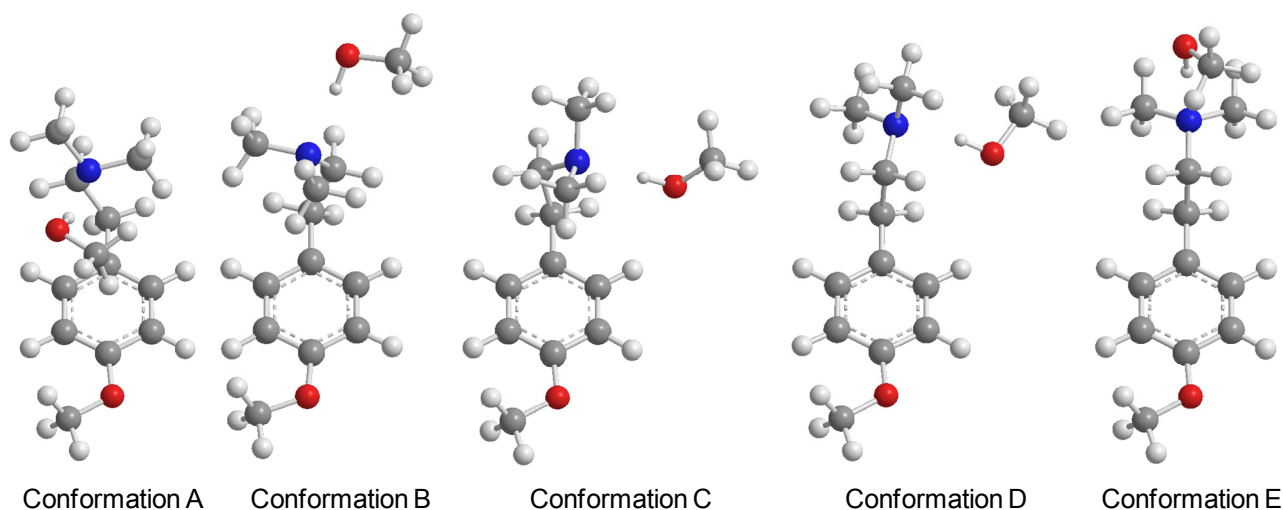

### Calculations of association enthalpies ( $\Delta H_{\text{calc}}$ ).

The frequency calculations of **2a** (conformation A) and **2b-f** (conformation D) were performed at the CP-MP2(full)/6-31G(d,p). The frequency calculations of **2a-f** (conformation A) and MeOH were performed at the MP2(full)/6-31G(d,p). No imaginary frequencies appeared in all results. All frequency calculations resulted in Zero point energy (ZPE) corrected energies and Enthalpies ( $H$ ) in Gaussian's output file. The association enthalpies ( $\Delta H_{\text{calc}}$ ) of intermolecular interactions for **2a-f** were given by the eq 1.

$$\Delta H_{\text{calc}} = H_{\text{complex}} - (H_{\text{amine}} + H_{\text{MeOH}}) \quad (1)$$

| Ar of amine                                         | Complex 2                   |                                | Amine 1                     |                              | MeOH                        |                             | $\Delta H_{\text{calc}}$ (kcal/mol) |
|-----------------------------------------------------|-----------------------------|--------------------------------|-----------------------------|------------------------------|-----------------------------|-----------------------------|-------------------------------------|
|                                                     | ZPE corrected $E$ (Hartree) | $H_{\text{complex}}$ (Hartree) | ZPE corrected $E$ (Hartree) | $H_{\text{amine}}$ (Hartree) | ZPE corrected $E$ (Hartree) | $H_{\text{MeOH}}$ (Hartree) |                                     |
| C <sub>6</sub> F <sub>5</sub>                       | <b>2a</b> (conformation A)  | -1053.67589                    | <b>1a</b> (conformation A)  | -938.32678                   | -938.29925                  |                             | -5.50                               |
| 3,4,5-F <sub>3</sub> -C <sub>6</sub> H <sub>2</sub> | <b>2b</b> (conformation D)  | -855.64869                     | <b>1b</b> (conformation A)  | -740.30031                   | -740.27367                  |                             | -4.98                               |
| 4-CF <sub>3</sub> -C <sub>6</sub> H <sub>4</sub>    | <b>2c</b> (conformation D)  | -664.56905                     | <b>1c</b> (conformation A)  | -549.22057                   | -549.20076                  |                             | -5.03                               |
| 4-F-C <sub>6</sub> H <sub>4</sub>                   | <b>2d</b> (conformation D)  | -657.62143                     | <b>1d</b> (conformation A)  | -542.27260                   | -542.24680                  | -115.33986                  | -5.22                               |
| Ph                                                  | <b>2e</b> (conformation D)  | -558.56706                     | <b>1e</b> (conformation A)  | -443.25134                   | -443.22588                  |                             | -5.39                               |
| 4-MeO-C <sub>6</sub> H <sub>4</sub>                 | <b>2f</b> (conformation D)  | -672.78128                     | <b>1f</b> (conformation A)  | -557.43199                   | -557.40204                  |                             | -5.38                               |

- 1 B. Kumar Das, N. Shibata and Y. Takeuchi, *J. Chem. Soc., Perkin Trans. 1*, 2002, 197.
- 2 R. F. Nystrom, *J. Am. Chem. Soc.*, 1955, **77**, 2544.
- 3 P. J. Smith and A. N. Bourns, *Canadian J. Chem.*, 1970, **48**, 125.
- 4 T. Ankner and G. Hilmersson, *Tetrahedron Lett.*, 2007, **48**, 5707.
- 5 M. Van der Auweraer, A. M. Swinnen and F. C. De Schryver, *J. Chem. Phys.*, 1982, **77**, 4110.
- 6 A.R. Lepley and R. H. Becker, *Tetrahedron*, 1965, **21**, 2365.
- 7 T. Tanaka, N. Shirai, J. Sugimori, Y. Sato, *J. Org. Chem.* 1992, **57**, 5034.
